# Supplementary material for: Informatics framework of traditional Sino-Japanese medicine (Kampo) unveiled by factor analysis
Source: PubMed Central journal article supplement (PMC4662717; doi:10.1007/s11418-015-0946-0), 2015-10-26
Supplement: 11418_2015_946_MOESM4_ESM.pdf [file 11418_2015_946_MOESM4_ESM.pdf]

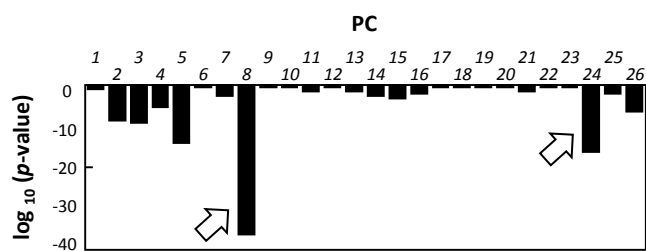

**Fig. S1** Contribution of PCs for the classification of Kampo formulas in PCA projections (Fig. 2).

PCs 8 and 24 had higher contributions to the classification of Kampo formulas.
